# Supplementary material
Source: publisher site journal article supplement (https://www.dovepress.com/article/327988)
Supplement: Supplementary file 1 [file get_supplementary_file.php]

**Appendix: Outline of qualitative interview with type 2 diabetes patients and their family members**

| **Personal data of interviewee** | | | | | |
| --- | --- | --- | --- | --- | --- |
| Serial Number |  | Interview Date |  | Interview Place |  |
| Name |  | Age |  | Sex |  |
| Educational Level |  | | Telephone Number |  | |
| **Interview Content** | | | | | |
| **Patient:**   1. Are you satisfied with your current knowledge of diabetes diet?If not, what kind of knowledge do you lack most? 2. Have you received any health education on diabetes diet?   If not, what was the reason or difficulty?  If yes, what do you think you have learned? How does it help with daily diet?   1. What do you think is the ideal model of diabetes dietary education?   **Family members:**   1. Do you think your current knowledge of diabetes diet is enough to help patients with diabetes? If not, what kind of knowledge do you lack most? 2. Have you received any health education on diabetes diet?   If not, what was the reason or difficulty?  If yes, what kind of effect do you think health education has on yourself?   1. What kind of effect do you think dietary health education can have on patients with diabetes? | | | | | |
